# Supplementary material
Source: publisher figshare collection journal article supplement (https://osapublishing.figshare.com/ndownloader/files/13648493)
Supplement: Supplementary file 1 [file 13648493]

#Comment1: Measured CARS spectrum I2 corresponds to ENF2
#Comment2: Collagen (C) of bone
Wavelength [nm]	Intensity [a.u.]
731.64423	15.6
731.7005	11.8
731.75677	9.84
731.81305	9.171428571
731.86932	9.266666667
731.9256	9.054545455
731.98187	8.345454545
732.03809	8.672727273
732.09436	8.290909091
732.15063	8.563636364
732.20691	8.727272727
732.26312	8.945454545
732.3194	9.272727273
732.37561	9.218181818
732.43188	9.054545455
732.4881	9.436363636
732.54431	9.6
732.60059	9.818181818
732.6568	9.872727273
732.71301	9.872727273
732.76923	9.872727273
732.8255	10.41818182
732.88171	10.2
732.93793	10.25454545
732.99414	9.927272727
733.05035	10.09090909
733.10651	10.25454545
733.16272	10.36363636
733.21893	9.818181818
733.27515	9.6
733.33136	9.490909091
733.38751	9.381818182
733.44373	8.945454545
733.49988	8.836363636
733.55609	8.781818182
733.61224	8.836363636
733.66846	8.672727273
733.72461	8.563636364
733.78082	8.509090909
733.83698	9.218181818
733.89313	9
733.94928	9.381818182
734.00543	9.218181818
734.06165	9.6
734.1178	9.654545455
734.17395	10.2
734.2301	10.36363636
734.28625	10.58181818
734.34235	10.52727273
734.3985	9.981818182
734.45465	9.709090909
734.5108	10.09090909
734.56689	9.490909091
734.62305	9.763636364
734.6792	9.763636364
734.73529	9.545454545
734.79144	8.890909091
734.84753	9.109090909
734.90363	9.163636364
734.95978	9.163636364
735.01587	9.709090909
735.07196	10.09090909
735.12811	10.14545455
735.1842	10.74545455
735.2403	10.74545455
735.29639	10.74545455
735.35248	11.01818182
735.40857	11.07272727
735.46466	11.01818182
735.52075	11.12727273
735.57678	11.23636364
735.63287	10.74545455
735.68896	10.30909091
735.74506	10.2
735.80109	10.52727273
735.85718	10.63636364
735.91321	10.41818182
735.9693	10.52727273
736.02533	10.63636364
736.08142	11.07272727
736.13745	11.07272727
736.19348	11.12727273
736.24957	11.4
736.3056	11.34545455
736.36163	12
736.41766	11.72727273
736.47369	11.61818182
736.52972	11.67272727
736.58575	11.56363636
736.64178	11.72727273
736.69781	11.4
736.75385	11.45454545
736.80988	11.18181818
736.86584	11.29090909
736.92188	11.61818182
736.97791	11.07272727
737.03387	11.50909091
737.0899	11.34545455
737.14587	11.61818182
737.2019	12.10909091
737.25787	12.49090909
737.31384	12.65454545
737.36987	12.65454545
737.42584	12.54545455
737.48181	12.27272727
737.53778	12.16363636
737.59375	12.27272727
737.64972	11.83636364
737.70569	12.10909091
737.76166	12
737.81763	11.61818182
737.8736	11.56363636
737.92957	11.50909091
737.98553	11.34545455
738.04144	11.4
738.09741	11.50909091
738.15338	11.61818182
738.20929	11.4
738.26526	11.23636364
738.32117	10.90909091
738.37714	10.85454545
738.43304	11.18181818
738.48895	10.74545455
738.54486	10.74545455
738.60083	11.12727273
738.65674	11.34545455
738.71265	11.61818182
738.76855	11.72727273
738.82446	11.89090909
738.88037	12.05454545
738.93628	12.21818182
738.99219	12.32727273
739.0481	12
739.10394	12.54545455
739.15985	12.92727273
739.21576	12.49090909
739.27167	12.27272727
739.32751	12.21818182
739.38342	12.05454545
739.43927	12.16363636
739.49518	12.43636364
739.55103	12.49090909
739.60687	12.32727273
739.66278	12.16363636
739.71863	11.94545455
739.77448	11.56363636
739.83032	12.10909091
739.88617	12.43636364
739.94202	12.43636364
739.99786	12.54545455
740.05371	12.6
740.10956	12.54545455
740.16541	12.87272727
740.22125	13.25454545
740.27704	13.25454545
740.33289	13.03636364
740.38873	12.92727273
740.44452	12.98181818
740.50037	13.14545455
740.55615	13.09090909
740.612	13.03636364
740.66779	13.25454545
740.72363	13.03636364
740.77942	12.27272727
740.83521	12.16363636
740.89099	12.54545455
740.94684	12.65454545
741.00262	13.30909091
741.05841	12.81818182
741.1142	12.65454545
741.16998	13.03636364
741.22571	13.25454545
741.28149	12.49090909
741.33728	12.43636364
741.39307	13.30909091
741.44885	12.65454545
741.50458	12.10909091
741.56036	12.10909091
741.61609	11.72727273
741.67188	12
741.7276	11.89090909
741.78339	12
741.83911	12.16363636
741.89484	12.70909091
741.95062	12.92727273
742.00635	12.54545455
742.06207	13.2
742.1178	13.58181818
742.17352	13.41818182
742.22925	13.25454545
742.28497	13.30909091
742.3407	13.25454545
742.39642	13.03636364
742.45215	13.14545455
742.50781	13.03636364
742.56354	13.03636364
742.61926	13.25454545
742.67493	13.2
742.73065	13.52727273
742.78632	13.74545455
742.84204	13.96363636
742.89771	13.90909091
742.95337	14.45454545
743.00909	14.50909091
743.06476	14.4
743.12042	14.72727273
743.17609	15
743.23175	15.05454545
743.28741	15.43636364
743.34308	15.32727273
743.39874	15.27272727
743.45441	15.43636364
743.51007	15.54545455
743.56573	15.32727273
743.6214	15.10909091
743.677	14.78181818
743.73267	14.72727273
743.78827	14.56363636
743.84393	14.34545455
743.89954	14.29090909
743.9552	14.29090909
744.0108	14.83636364
744.06647	14.45454545
744.12207	14.67272727
744.17767	14.4
744.23328	14.89090909
744.28888	15.54545455
744.34448	14.89090909
744.40009	14.72727273
744.45569	14.78181818
744.51129	14.56363636
744.56689	14.4
744.6225	14.34545455
744.6781	14.56363636
744.73364	14.07272727
744.78925	14.34545455
744.84485	14.4
744.90039	14.34545455
744.95599	15
745.01154	15.43636364
745.06714	15.70909091
745.12268	15.81818182
745.17822	16.30909091
745.23376	15.49090909
745.28937	16.03636364
745.34491	16.09090909
745.40045	16.63636364
745.45599	16.36363636
745.51154	16.41818182
745.56708	16.47272727
745.62262	16.58181818
745.67816	16.90909091
745.73364	17.12727273
745.78918	17.4
745.84473	17.72727273
745.90021	17.18181818
745.95575	17.4
746.01123	16.96363636
746.06677	17.23636364
746.12225	16.90909091
746.1778	17.12727273
746.23328	17.50909091
746.28876	17.89090909
746.34424	17.89090909
746.39978	17.34545455
746.45526	17.4
746.51074	18.43636364
746.56622	18.87272727
746.6217	19.30909091
746.67719	19.58181818
746.7326	19.8
746.78809	20.01818182
746.84357	19.74545455
746.89905	19.09090909
746.95447	19.63636364
747.00995	20.12727273
747.06537	20.61818182
747.12085	20.4
747.17627	20.45454545
747.23175	20.56363636
747.28717	20.34545455
747.34259	20.78181818
747.39801	20.56363636
747.45349	20.56363636
747.50891	20.94545455
747.56433	20.45454545
747.61975	20.94545455
747.67517	21.21818182
747.73059	20.94545455
747.78595	20.89090909
747.84137	21.16363636
747.89679	21.54545455
747.95221	22.2
748.00757	23.07272727
748.06299	23.4
748.11835	23.34545455
748.17377	23.50909091
748.22913	23.45454545
748.28455	23.83636364
748.3399	23.78181818
748.39526	24.16363636
748.45062	24.05454545
748.50604	23.94545455
748.5614	23.50909091
748.61676	23.29090909
748.67212	23.61818182
748.72748	24.43636364
748.78284	24.81818182
748.83813	25.90909091
748.89349	25.96363636
748.94885	27
749.00421	27.54545455
749.05951	28.03636364
749.11487	28.52727273
749.17017	28.41818182
749.22552	28.90909091
749.28082	28.96363636
749.33618	28.74545455
749.39148	29.12727273
749.44678	28.8
749.50208	29.23636364
749.55743	29.23636364
749.61273	29.61818182
749.66803	30.21818182
749.72333	30.92727273
749.77863	31.63636364
749.83386	31.96363636
749.88916	32.67272727
749.94446	33.05454545
749.99976	33.54545455
750.05499	33.6
750.11029	34.25454545
750.16559	34.36363636
750.22083	34.58181818
750.27612	34.8
750.33136	35.01818182
750.3866	35.29090909
750.44189	35.4
750.49713	35.67272727
750.55237	36.16363636
750.6076	36.70909091
750.66284	37.30909091
750.71808	37.41818182
750.77332	37.47272727
750.82855	37.58181818
750.88379	38.07272727
750.93903	38.23636364
750.99426	38.72727273
751.04944	39.6
751.10468	39.87272727
751.15985	39.92727273
751.21509	39.87272727
751.27026	40.25454545
751.3255	39.98181818
751.38068	40.96363636
751.43591	41.45454545
751.49109	41.83636364
751.54626	42.43636364
751.60144	42.6
751.65662	42.43636364
751.71179	42.21818182
751.76697	42.49090909
751.82214	43.63636364
751.87732	43.74545455
751.9325	43.85454545
751.98767	44.67272727
752.04285	44.78181818
752.09796	45.49090909
752.15314	45.70909091
752.20825	46.25454545
752.26343	46.47272727
752.31854	47.07272727
752.37372	47.56363636
752.42883	47.89090909
752.48395	48.38181818
752.53912	49.90909091
752.59424	49.41818182
752.64935	50.01818182
752.70447	49.63636364
752.75958	50.29090909
752.8147	50.67272727
752.86981	51.81818182
752.92493	52.03636364
752.97998	53.07272727
753.0351	53.12727273
753.09021	54.05454545
753.14532	53.89090909
753.20038	54.6
753.25549	55.47272727
753.31055	56.18181818
753.3656	56.94545455
753.42072	57.6
753.47577	57.70909091
753.53082	58.8
753.58594	59.01818182
753.64099	59.18181818
753.69604	59.23636364
753.7511	60.27272727
753.80615	60.98181818
753.86121	61.63636364
753.91626	62.78181818
753.97125	62.56363636
754.02631	63.05454545
754.08136	63.43636364
754.13635	64.14545455
754.19141	65.12727273
754.24646	65.50909091
754.30145	66.32727273
754.35645	66.92727273
754.4115	67.2
754.46649	66.87272727
754.52148	66.65454545
754.57654	67.41818182
754.63153	67.74545455
754.68652	67.90909091
754.74152	67.90909091
754.79651	68.29090909
754.8515	69.27272727
754.90649	69.98181818
754.96143	70.41818182
755.01642	71.07272727
755.07141	72.16363636
755.12634	72.76363636
755.18134	73.69090909
755.23633	74.4
755.29126	75.92727273
755.34619	77.89090909
755.40118	79.58181818
755.45612	80.4
755.51105	81
755.56598	81.98181818
755.62097	83.50909091
755.6759	84.27272727
755.73083	85.03636364
755.78577	85.74545455
755.8407	87.21818182
755.89557	87.92727273
755.9505	87.92727273
756.00543	87.6
756.06036	88.52727273
756.11523	88.25454545
756.17017	88.63636364
756.22504	89.89090909
756.27997	90.70909091
756.33484	92.29090909
756.38977	93.32727273
756.44464	93.65454545
756.49951	94.69090909
756.55438	95.78181818
756.60925	96.87272727
756.66418	97.47272727
756.71906	99.43636364
756.77393	101.0181818
756.82874	100.5818182
756.88361	102
756.93848	102.6
756.99335	103.4727273
757.04816	104.6727273
757.10303	105.4909091
757.1579	106.3090909
757.21271	107.2363636
757.26758	107.8363636
757.32239	108.7090909
757.3772	110.2909091
757.43207	112.2545455
757.48688	112.1454545
757.54169	112.7454545
757.5965	113.6181818
757.65131	115.9636364
757.70612	117.4909091
757.76093	118.3636364
757.81573	120.0545455
757.87054	122.5090909
757.92535	123.9818182
757.9801	124.1454545
758.03491	124.3090909
758.08966	126
758.14447	128.9454545
758.19922	130.4727273
758.25403	130.4727273
758.30878	130.3090909
758.36359	131.7272727
758.41833	132.9818182
758.47308	134.0181818
758.52783	135.4909091
758.58258	136.4727273
758.63733	138.4363636
758.69208	140.2363636
758.74683	140.4
758.80157	142.4727273
758.85632	143.8363636
758.91107	146.2909091
758.96576	148.8
759.02051	151.0363636
759.0752	152.1272727
759.12994	152.6181818
759.18463	154.6363636
759.23938	156
759.29407	157.8545455
759.34875	159.1090909
759.4035	160.5272727
759.45819	162.5454545
759.51288	163.9636364
759.56757	165.2181818
759.62225	164.5090909
759.67694	166.4181818
759.73163	168.7636364
759.78632	170.5636364
759.84094	172.5818182
759.89563	174.5454545
759.95032	176.1818182
760.00494	176.6727273
760.05963	178.2545455
760.11426	179.8363636
760.16895	181.0363636
760.22357	182.4545455
760.2782	183.6545455
760.33289	185.3454545
760.38751	186.8181818
760.44214	187.8545455
760.49677	187.8
760.55139	189.1090909
760.60602	191.1818182
760.66064	192.6
760.71527	194.2909091
760.76984	195.1636364
760.82446	197.8363636
760.87909	199.1454545
760.93365	200.4
760.98828	201.4909091
761.04285	203.4545455
761.09747	205.4181818
761.15204	207.4363636
761.20667	208.8
761.26123	209.7272727
761.3158	211.5818182
761.37036	214.0909091
761.42493	215.7818182
761.47949	218.1818182
761.53406	219.7636364
761.58862	221.4545455
761.64319	223.0363636
761.69775	224.8363636
761.75226	227.5636364
761.80682	229.4727273
761.86139	231.3272727
761.91589	231.9272727
761.97046	232.8545455
762.02496	234.5454545
762.07953	237.1636364
762.13403	239.5090909
762.18854	242.4545455
762.24304	244.9636364
762.29755	248.5090909
762.35211	250.1454545
762.40662	251.8909091
762.46112	254.1272727
762.51556	256.8
762.57007	259.9090909
762.62457	262.2
762.67908	263.2363636
762.73352	265.5272727
762.78802	267.8181818
762.84253	270.1090909
762.89697	271.5818182
762.95148	273.1090909
763.00592	276.1090909
763.06036	279.6545455
763.11487	282.0545455
763.16931	284.4545455
763.22375	286.7454545
763.2782	289.6909091
763.33264	292.3636364
763.38708	293.9454545
763.44153	296.6181818
763.49597	299.5090909
763.55035	301.4181818
763.6048	303.3272727
763.65924	304.4727273
763.71362	306.9818182
763.76807	308.2363636
763.82245	309.9272727
763.87689	309.9272727
763.93127	310.2
763.98572	312.4363636
764.0401	312.4363636
764.09448	313.4727273
764.14886	316.4727273
764.20325	319.5272727
764.25763	321.7090909
764.31201	325.8
764.36639	329.8363636
764.42078	332.5090909
764.47516	337.6363636
764.52948	341.8909091
764.58386	344.6181818
764.63824	350.0727273
764.69257	354.7090909
764.74695	356.6181818
764.80127	359.1272727
764.85559	360.8727273
764.90997	360.7636364
764.96429	362.8909091
765.01862	366.4909091
765.07294	368.9454545
765.12726	372.1090909
765.18158	376.0363636
765.2359	377.4
765.29022	379.4727273
765.34454	385.5818182
765.39886	390.2727273
765.45313	396.9272727
765.50745	404.0181818
765.56177	406.5818182
765.61603	412.6363636
765.67035	417.3272727
765.72461	422.1818182
765.77887	426.6545455
765.83319	432
765.88745	438.3272727
765.94171	443.5636364
765.99597	448.2545455
766.05023	451.3636364
766.10449	455.2363636
766.15875	463.2
766.21301	465.1090909
766.26727	468.6545455
766.32147	472.9090909
766.37573	477.5454545
766.42999	485.4545455
766.48419	489.9272727
766.53845	492.5454545
766.59265	495.1090909
766.64685	500.7818182
766.70111	506.4
766.75531	510.4363636
766.80951	513.7636364
766.86371	519.7636364
766.91791	523.8545455
766.97211	527.4
767.02631	527.7818182
767.08051	531.9272727
767.1347	537.2727273
767.1889	544.2
767.2431	550.2
767.29724	552.7090909
767.35144	558.7636364
767.40558	568.7454545
767.45978	576.6545455
767.51392	583.2545455
767.56805	590.8909091
767.62225	597.6
767.67639	604.4181818
767.73053	610.9636364
767.78467	616.4181818
767.83881	622.9636364
767.89294	629.9454545
767.94708	633.4363636
768.00122	638.1272727
768.05536	643.4181818
768.10944	650.7818182
768.16357	656.1818182
768.21771	662.1272727
768.27179	668.2909091
768.32593	675.8181818
768.38	684.1090909
768.43414	688.3090909
768.48822	698.6727273
768.5423	706.9090909
768.59637	715.3090909
768.65045	723.1090909
768.70453	729
768.75861	734.8909091
768.81268	742.0363636
768.86676	749.4545455
768.92084	756.7090909
768.97491	764.7272727
769.02893	772.8545455
769.08301	778.3090909
769.13708	783.3818182
769.1911	786.9818182
769.24518	791.1272727
769.29919	797.5090909
769.35321	807.4363636
769.40723	821.4
769.4613	830.7818182
769.51532	836.0727273
769.56934	845.2909091
769.62335	855.1090909
769.67737	865.5818182
769.73138	879.0545455
769.78534	892.4727273
769.83936	901.8
769.89337	911.2363636
769.94739	920.6727273
770.00134	927.5454545
770.05536	937.0363636
770.10931	946.6909091
770.16327	954.4909091
770.21729	965.4
770.27124	969.7636364
770.3252	980.1818182
770.37915	991.4727273
770.43311	1000.145455
770.48706	1005.927273
770.54102	1014.490909
770.59497	1020.381818
770.64893	1025.509091
770.70288	1037.563636
770.75684	1047.218182
770.81073	1056.981818
770.86469	1066.2
770.91858	1069.472727
770.97253	1071.490909
771.02643	1084.472727
771.08032	1099.581818
771.13428	1113.763636
771.18817	1128.109091
771.24207	1140.381818
771.29596	1151.236364
771.34985	1155.327273
771.40375	1159.745455
771.45764	1171.254545
771.51154	1187.127273
771.56543	1204.963636
771.61926	1216.909091
771.67316	1230.272727
771.72699	1243.690909
771.78088	1259.945455
771.83472	1271.727273
771.88861	1281.272727
771.94244	1301.454545
771.99628	1316.781818
772.05017	1332.272727
772.104	1343.890909
772.15784	1351.363636
772.21167	1364.563636
772.2655	1373.672727
772.31934	1381.636364
772.37311	1384.418182
772.42694	1393.418182
772.48077	1406.836364
772.53461	1417.309091
772.58838	1430.236364
772.64221	1445.345455
772.69598	1460.563636
772.74976	1477.254545
772.80359	1489.472727
772.85736	1507.581818
772.91113	1522.745455
772.9649	1535.563636
773.01868	1553.727273
773.07245	1565.236364
773.12622	1576.309091
773.17999	1586.290909
773.23376	1590.818182
773.28754	1601.181818
773.34125	1612.309091
773.39502	1623.818182
773.44879	1636.527273
773.5025	1648.8
773.55627	1666.472727
773.60999	1675.254545
773.6637	1693.254545
773.71741	1706.454545
773.77118	1716.927273
773.82489	1733.290909
773.8786	1744.527273
773.93231	1760.890909
773.98602	1779
774.03967	1788.981818
774.09338	1798.854545
774.14709	1811.509091
774.20081	1824.981818
774.25446	1830
774.30817	1838.4
774.36182	1856.454545
774.41553	1868.454545
774.46918	1877.672727
774.52283	1887.6
774.57654	1894.527273
774.63019	1911.327273
774.68384	1923.381818
774.73749	1931.345455
774.79114	1943.127273
774.84479	1955.509091
774.89838	1978.745455
774.95203	1993.2
775.00568	2000.345455
775.05933	2017.963636
775.11292	2026.472727
775.16656	2033.181818
775.22015	2026.745455
775.2738	2029.090909
775.32739	2030.127273
775.38098	2033.890909
775.43457	2030.890909
775.48816	2011.909091
775.54175	1991.836364
775.59534	1975.2
775.64893	1948.472727
775.70251	1918.854545
775.7561	1888.854545
775.80969	1864.745455
775.86322	1833.436364
775.91681	1799.4
775.9704	1756.309091
776.02393	1706.563636
776.07751	1654.909091
776.13104	1603.418182
776.18457	1550.945455
776.2381	1494.163636
776.29169	1442.181818
776.34521	1386.872727
776.39874	1325.727273
776.45227	1262.127273
776.5058	1196.290909
776.55927	1126.2
776.61279	1065.981818
776.66632	1012.090909
776.71979	949.2545455
776.77332	888.1636364
776.82684	829.8545455
776.88031	762.8181818
776.93378	692.6727273
776.9873	627.3818182
777.04077	563.7818182
777.09424	505.1454545
777.14771	451.0363636
777.20117	396.3818182
777.25464	339.6
777.30811	293.8363636
777.36157	249.2727273
777.41504	205.3636364
777.46851	169.9090909
777.52191	142.3090909
777.57538	115.9090909
777.62878	92.78181818
777.68225	71.34545455
777.73566	54.6
777.78912	42.21818182
777.84253	32.67272727
777.89594	24.54545455
777.94934	19.41818182
778.00275	15.81818182
778.05615	13.25454545
778.10956	10.30909091
778.16296	8.836363636
778.21637	7.690909091
778.26978	6.654545455
778.32312	6.436363636
778.37653	5.781818182
778.42993	5.236363636
778.48328	5.290909091
778.53662	5.454545455
778.59003	5.181818182
778.64337	5.345454545
778.69672	5.618181818
778.75012	5.618181818
778.80347	6.109090909
778.85681	7.2
778.91016	7.636363636
778.96344	8.890909091
779.01678	9.545454545
779.07013	10.8
779.12347	11.61818182
779.17676	12.76363636
779.2301	14.4
779.28339	16.36363636
779.33673	19.52727273
779.39001	22.74545455
779.44336	26.78181818
779.49664	31.36363636
779.54993	36.16363636
779.60321	40.63636364
779.65649	43.69090909
779.70978	45
779.76306	45.81818182
779.81635	44.89090909
779.86963	44.78181818
779.92285	44.18181818
779.97614	44.07272727
780.02942	45.05454545
780.08264	46.14545455
780.13586	46.03636364
780.18915	46.09090909
780.24237	45.98181818
780.29559	46.2
780.34888	46.25454545
780.4021	46.96363636
780.45532	46.36363636
780.50854	44.61818182
780.56177	41.45454545
780.61493	36.27272727
780.66815	29.83636364
780.72137	24.38181818
780.7746	19.03636364
780.82776	14.78181818
780.88098	11.83636364
780.93414	9.218181818
780.9873	7.363636364
781.04053	5.672727273
781.09369	4.581818182
781.14685	3.818181818
781.20001	3.218181818
781.25317	3.327272727
781.30634	2.945454545
781.3595	3.109090909
781.41266	3.218181818
781.46582	2.890909091
781.51898	2.727272727
781.57208	2.727272727
781.62524	3.218181818
781.67834	3.6
781.73151	4.090909091
781.78461	4.036363636
781.83771	3.927272727
781.89087	4.309090909
781.94397	4.254545455
781.99707	4.363636364
782.05017	4.8
782.10327	5.181818182
782.15637	5.018181818
782.20947	5.018181818
782.26251	4.527272727
782.31561	4.636363636
782.36871	4.527272727
782.42175	4.418181818
782.47485	4.363636364
782.52789	4.363636364
782.58099	3.763636364
782.63403	4.036363636
782.68707	4.418181818
782.74011	4.472727273
782.79315	4.472727273
782.84619	4.2
782.89923	3.927272727
782.95227	4.2
783.00531	4.745454545
783.05835	4.854545455
783.11139	5.345454545
783.16437	5.4
783.21741	4.8
783.27039	4.418181818
783.32343	4.363636364
783.3764	3.927272727
783.42938	4.472727273
783.48242	4.854545455
783.5354	4.254545455
783.58838	3.218181818
783.64136	2.509090909
783.69434	2.345454545
783.74731	3.163636364
783.80023	3.054545455
783.85321	2.727272727
783.90619	2.890909091
783.95911	2.890909091
784.01208	2.945454545
784.065	2.236363636
784.11798	2.563636364
784.1709	3.436363636
784.22382	3.927272727
784.27679	3.654545455
784.32971	3.054545455
784.38263	2.945454545
784.43555	3.381818182
784.48846	3.272727273
784.54138	3.218181818
784.59424	2.890909091
784.64716	3.545454545
784.70007	3.6
784.75293	3.490909091
784.80585	3.381818182
784.8587	2.836363636
784.91162	3.054545455
784.96448	3.272727273
785.01733	3.109090909
785.07019	3.272727273
785.12305	3.490909091
785.1759	3.709090909
785.22876	3.436363636
785.28162	3.272727273
785.33447	3.381818182
785.38733	3.272727273
785.44019	3.490909091
785.49298	3.490909091
785.54584	3.381818182
785.59863	3.436363636
785.65149	3.163636364
785.70428	3.381818182
785.75708	3.490909091
785.80994	3.218181818
785.86273	3
785.91553	2.454545455
785.96832	2.509090909
786.02112	2.727272727
786.07391	2.890909091
786.12665	2.836363636
786.17944	2.727272727
786.23224	3.381818182
786.28497	3.218181818
786.33777	2.890909091
786.3905	3.054545455
786.4433	3.381818182
786.49603	3.490909091
786.54877	3.381818182
786.6015	3.327272727
786.6543	2.945454545
786.70703	3.6
786.75977	3.763636364
786.81244	3.327272727
786.86517	3.218181818
786.91791	3.381818182
786.97064	3.327272727
787.02332	3.927272727
787.07605	4.090909091
787.12872	3.927272727
787.18146	3.981818182
787.23413	4.254545455
787.2868	3.933333333
787.33954	4.2
787.39221	4.56
787.44489	3.4
787.49756	6.6
